# Supplementary figures and images for: Activated Rice Husk Ash: A Sustainable and High-Capacity Adsorbent for the Remediation of Carbol Fuchsin Dye from Aqueous Effluents
Source: Research Square preprint supplement (doi:10.21203/rs.3.rs-8364635/v1), 2025-12-16

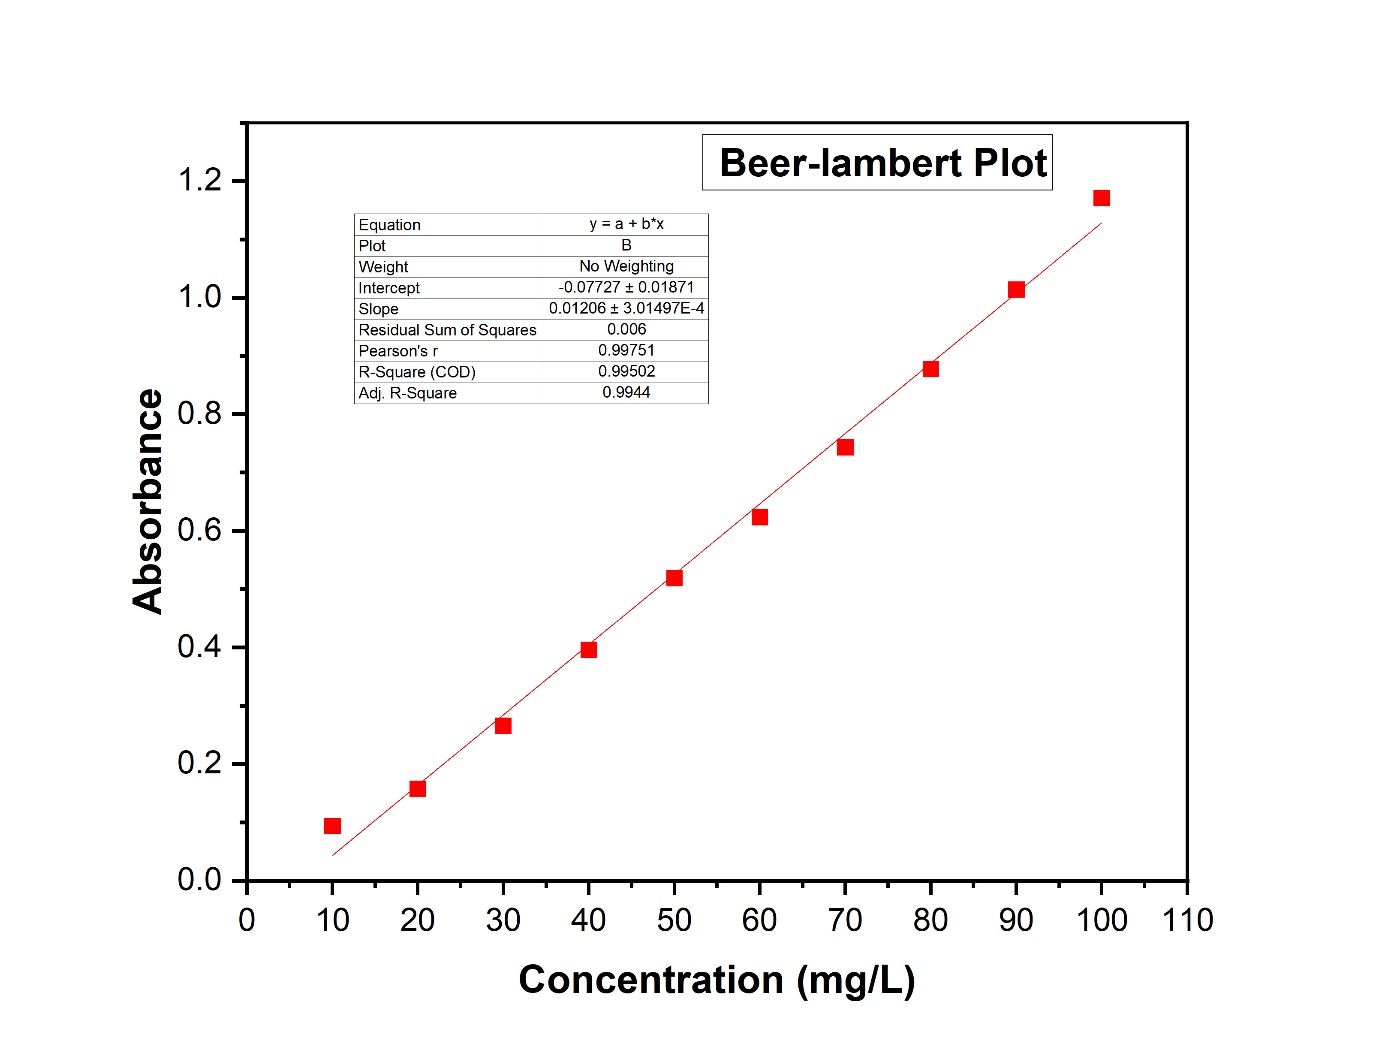


**Plot Concentration vs Absorbance**

Supplement: Supplementary file 1 [file 394a4062adcc11634d0109ec.docx]
